# Supplementary material
Source: PubMed Central journal article supplement (PMC4959471)
Supplement: AEM.00057-16_zam999117058so1.pdf [file AEM.00057-16_zam999117058so1.pdf]

1 Supplementary materials for

2 **Metabolic engineering of a probiotic *Saccharomyces boulardii***

3

4 Jing-Jing Liu<sup>1</sup>, In Iok Kong<sup>1,2</sup>, Guo-Chang Zhang<sup>2</sup>, Lahiru N. Jayakody<sup>2</sup>, Heejin Kim<sup>1,2</sup>,

5 Peng-Fei Xia<sup>1,3</sup>, Suryang Kwak<sup>1,2</sup>, Bong Hyun Sung<sup>4</sup>, Jung-Hoon Sohn<sup>4</sup>, Hanna E.

6 Walukiewicz<sup>5</sup>, Christopher V. Rao<sup>5</sup>, Yong-Su Jin<sup>1,2,\*</sup>

7 (Running title: Metabolic engineering of *Saccharomyces boulardii*)

8

9 <sup>1</sup> Carl R. Woese Institute for Genomic Biology, University of Illinois at

10 Urbana-Champaign, 1206 West Gregory Drive, Urbana, IL 61801, United States

11 <sup>2</sup> Department of Food Science and Human Nutrition, University of Illinois at

12 Urbana-Champaign, 905 South Goodwin Avenue, Urbana, IL 61801, United States

13 <sup>3</sup> School of Environmental Science and Engineering, Shandong University, 27 Shanda

14 Nanlu, Jinan, 250100, China

15 <sup>4</sup> Bioenergy and Biochemical Research Center, Korea Research Institute of Bioscience

16 and Biotechnology, 125 Gwahak-ro, Yuseong-gu, Daejeon 34141, Korea

17 <sup>5</sup> Department of Chemical and Biomolecular Engineering, University of Illinois at

18 Urbana-Champaign, 905 South Goodwin Avenue, Urbana, IL 61801, United States

19

20 \* Corresponding author: Yong-Su Jin (ysjin@illinois.edu).

21 Mailing address: 1206 W. Gregory Drive, Carl R. Woese Institute for Genomic Biology,

22 Urbana, IL 61801, United States.

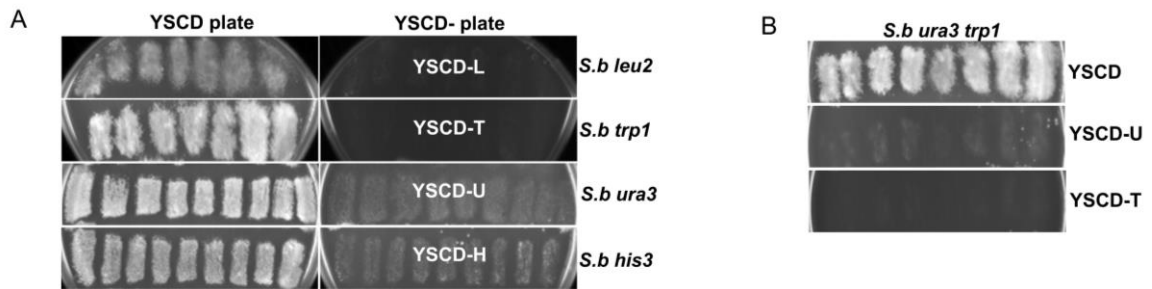

23

24 **Fig. S1** The screen of auxotrophic markers inactivation. (A) The screen of single

25 deletion of each auxotrophic markers; (B) Identification of *ura3 trp1* double

26 inactivation using tandem guide RNA. *S. b* is short for *Saccharomyces boulardii*.

27 YSCD: yeast synthetic complete medium with 20 g/L glucose as a carbon source;

28 YSCD-Leu: YSCD medium minus leucine; YSCD-Trp: YSCD medium minus

29 tryptophan; YSCD-Ura: YSCD medium minus uracil; YSCD-His: YSCD medium

30 minus histidine.

31

32

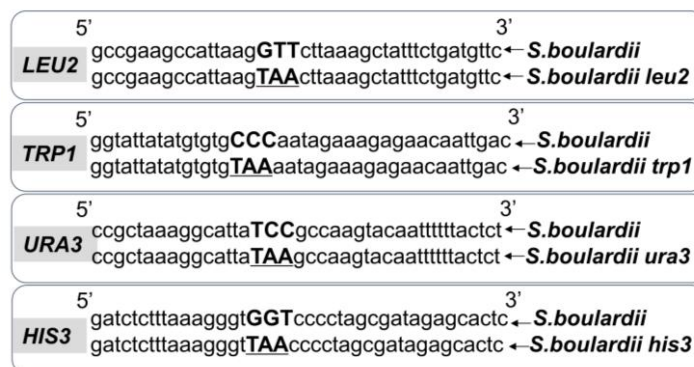

33

34 **Fig. S2** The sequencing results of four marker genes *LEU2*, *TRP1*, *URA3* and *HIS3*

35 indicated that the targeted nucleotides were replaced by the stop codon (TAA) as

36 expected.

37

38

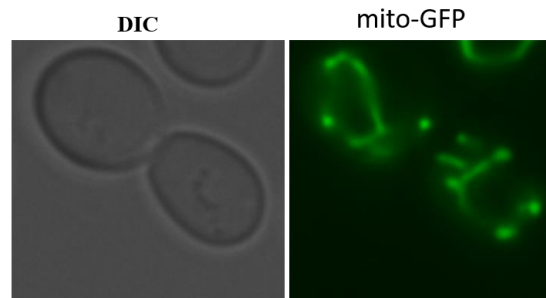

39

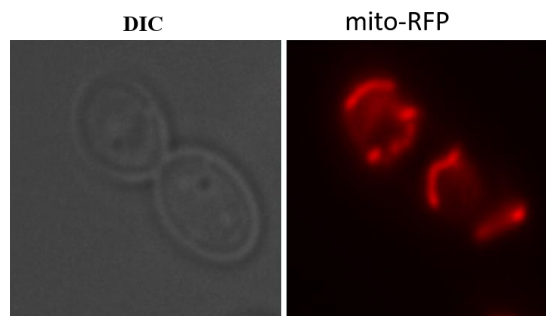

40 **Fig. S3.** Targeted localization of the green fluorescent protein (GFP) and red  
41 fluorescent protein (RFP) in mitochondria of *S. boulardii* expressing GFP and mRuby  
42 with a mitochondrial targeting sequence by introducing pVT100U-mtGFP and  
43 pVT100U-mt-mRuby plasmid, respectively. The left panel is differential interference  
44 contrast (DIC) images; right panel is GFP and RFP fluorescence.

45

#### 46 **Intergenic site CS8 for CRISPR-Cas9 based integration.**

47 The 2.7 kb non-coding region between YPR015C and a CDS of unknown function  
48 from chromosome XVI was chosen for further target gene insertion. The map and  
49 genome sequence from Yeastgenome.org are listed as follows:

50

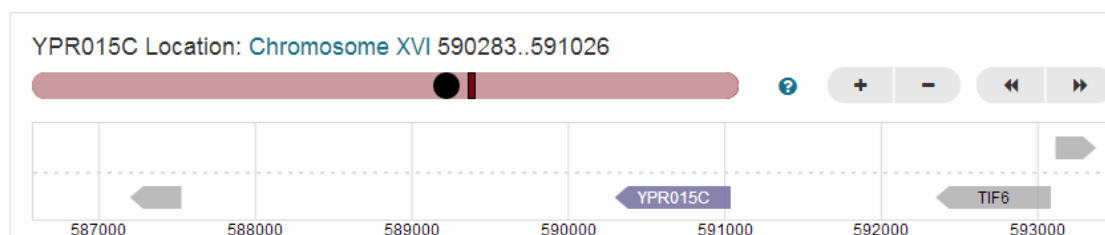

51

<http://www.yeastgenome.org/locus/S000006219/overview>

52 **NNNN: CDS of functional gene of YPR015C**  
53 **NNNN: CDS of not essential protein, or protein with no function (or unknown**  
54 **function)**  
55 nnnn: Non-coding region  
56 nnnn: PAM sequence for CS8  
57 nnnn: Target sequence for guide RNA  
58 nnnn: Homologous region for integration  
59 nnnn: sequencing primer site

60  
61 **[CS8 region, Chromosome XVI]**

62 **.....TAGATCTTATACAAAAGCAACTGCGCGCTGTGGTAAAGCTACGGA**  
63 **AACAATGTCCTATCTGTGGGAAGGTTTGTTCGAGACCTTCAACACTGA**  
64 **GGACTCATTACTTAATACATACGGGAGACACACCTTCAATGTACTTG**  
65 **GGAGCATTGCAACAAATCTTCAATGTCAAGAGTAAACATGTTAAGGCA**  
66 **TTAAGAACCCATCAAAAAGAAAATAGCAAAGAAAAACATCAGTGA**aag  
67 cattgtttagaatatgttttcagtgtagtttgatgtaggtgtgacacttttaccagtaaaatgagtatagatatgtattagttc  
68 catataatattacatgtagccaacaatcaatcttactgacttccgattttgaaatgtgagaggattttgtcgaattataatttc  
69 tacaagaaattgttgcgaatgcatcagcattgttaacgggtctatactgccgcacgatacattttattctgtctagttcgtaa  
70 gacaaaggacctttcatttagtacaacgttccgacacggatgtcttgatgaatctctgtaccaggaattcaattacctgacta  
71 gtatgcagttcactatcaaaaaaaaaaagggttaaattggtataatcatggttaaagaacaaacagcctctttctctacaa  
72 aagtatgttaaattaggttagttcaaatgctgcacgtatcgcaacgttgttaatatataatgatccattggaacaatgaagt  
73 ttacagaagctcaaaataatgcaagaataattacgtcaagggagtcatacaaaactaagaaaacaaaggaattgactaag  
74 ttgagcgcgaatgatataatccatgcttgcattctgattcatacatatcgtttctgtcatttcaatggaagctttattatcaattacc  
75 acaaccttagtattgtcttatttggcctaaaggagttcatgctgtagtgatagtcacccatgaagtgattagtggaacat  
76 agaaggggataaatttctatcgatacaaaagaaaaaccaggattattgtttaccaccacatttcaactttcccgtgaat  
77 ttctactaccctcatttgaagaacgctttccactcttaggttggcgttgcattcttttccattcaatgcaccaagactta  
78 atttgttggttaaactcttatttctgtcagtttaaccaaaaaattacctacggtaattagtgaaggccaaaatctaattgtaca  
79 atgattcaatcattcttattgaggagaagctaccgagaagaaccctaccactggtacaacacaagggaacggctctcattg  
80 acctcgtgcataaccgggaaggtaacacatgaatgctgtgtttgaaatcatctccaatccaaactataggaatgaaaaat  
81 ttgggtacaatgtcttctacaatcgtattctgtcagcaatgttccaaggatgacagactcttctaagaaaagattca  
82 gttcaaaattfacataacagtgaaactatgcagaaaatttacttctagaccacgcatttaacaataatgtttcccgaacaata  
83 agtatttggcgtttaaagacgttatcagttattttagagaaggtgttaccattcgtgctcccatactaaaaccaaggggtaa  
84 taggaccacattcgttctgacagccaacaacgtgccactagcaggacagttattggaggttatattatgtaattattgttag  
85 ctgataaatgattacagaaagcgtgatgttactgggctgcttattcagcaatccccacgatatttacttcaagagaaag  
86 aatgtttgatgtaagtttatttgaacgtggaacttggcgtggggcatttatggctgctatcacacaaatcgcggagcagagta  
87 ccccgtgattataacacaactcactaaaaatcgtcaaaattgggggttacgggttagcgcggcagctcatcgagggaac  
88 agcacctagtgcacgtttaaattgatagatcttcagaacgaaatcaaaatcttcgcagtatcattacgtttcaagaaactaaagt  
89 gtttggagaaattaggaacgaaaaaagctactatagaatttagcctgtcttcaactgctgctcctcggcttttacttgccta  
90 agtatatgccgaatgggcgataagcgggagtgctggcagatctgtggtaaaaaaagatagcaataaaaaatgatgaatt  
91 taacagtagtcttgaattaaacaagtgatcttgcactgaatacttccatcaatgagtcgctaaaatgaaatggctgcacaat  
92 ctctccgcatactttaaaggcagcaatttagccagttgatccctacatttccacagaaacgaaaaagtgaatagttat  
93 tgcggccaatcgtaaagcttagcggccttagctttatgattgttgaagaaagtttgccttttactctccttcaggtgtca  
94 gtattaacaaacggcgttgaatgtttaaagttatttttattcatcaaatcgaacttgatactttctcgggtgatgctgctaattgatt  
95 ataccattaaggtgtcaccagtgtaaaaatgttcacggactgtgcaactacgtgtgaaggtaagttactcaacgcaaga

96 aacgtaacattttacaaatttagctgcagtactatgtttaagtaatccaaagggaactattgttatatcccagaattattaca  
97 ttcgtttcttagttcataaacaatgaatacctattgaatggatagaaattctgacttgattttacgagttattattgctgacattagtc  
98 caaagacatctcagttttgttcctctacaacccaatgaggaggctagccagggtgtcgccecaaaaaatagccaataaag  
99 cggcaactttctgt**ATGTCTTGCAATTTTTCCGCTGACTTGGGAGTAGAGTACA**  
100 **GCTGCGCGGAGTCGCGTATTACAAATCTTGTACTTTGCATTCTGTGCAT**  
101 **ACGTGAGGAAAAAGCAGCACCTGTTGTGAAAAAAGATAAATTTCTTTT**  
102 **TTTCATTTTTCTATCCTCAAAGGAAAATCTTTTCTGCGAAATTTCTAGC**  
103 **CGCTCTTCAGTTTCCGAAGTAAAGTCGCTGAGGGCGAAAAACAACTTT**  
104 **ATTTGCCACACGCTGTTATAGGCTTCCAGGGAGCAAAGCGCAATTG**  
105 **GGAATAAGGTTTCTCAATTGAATGGTTTGCTTCGCCTACAGCATTAAC**  
106 cagaaggaattgatctctgtatgtccgctaacagatctgtccattaattgtttattttcttcaggtaggctgagcccactttgt  
107 agtagctccctaccattactttggcctgtagttattggctttgatttttcttctatgacaatcccgttgagcaaccttgccaag  
108 ggctcttttgaaaaaaggcgtgggcaagatctctgtat.....

109

## 110 **Human lysozyme with chicken signal peptide.**

111 The gBlock sequence of human lysozyme with a chicken-lysozyme signal sequence

112 based on previous report (1, 2) is listed as follows:

113

114 NNNN: enzyme site for the confirmation of insertion of gBlock into plasmid

115 **nnnn: Chicken-lysozyme signal sequence**

116 **nnnn: Starting codon**

117 **nnnn: Stop codon**

118

119 GGTACC**atgaggtcttgtaaatcttggtgcttgcttctgccctggctgctctgggg**aaggtttcgaacgttgaat  
120 tggccagaactttgaagagattgggtatggacggtaccgtggtatctctttggtaactggatgtgtttggccaagtgggaat  
121 ctggttacaacactagagctactaactacaacgccggtgaccgttctactgactacggtatcttccaaattaactctagatact  
122 ggtgtaacgacggtaagactccagcgccgtaacgctgtcagttgtcttctgctttgttcaagacaacatcgctgac  
123 gccgttgctgtgtaagagagtcgtagagaccacaaggtatcagagcttgggtcgttggcgtaacagatgtcaaac  
124 agagacgtcagacaatacgttcaaggtgtggtgtc**taa**GTTCGAC

125

## 126 **References:**

- 127 **1. Muraki M, Jigami Y, Tanaka H, Harada N, Kishimoto F, Agui H, Ogino S, Nakasato S.** 1986.  
128 Expression of Synthetic Human Lysozyme Gene in Escherichia coli. Agricultural and  
129 Biological Chemistry **50**:713-723.
- 130 **2. Jigami Y, Muraki M, Harada N, Tanaka H.** 1986. Expression of synthetic human-lysozyme gene in  
131 Saccharomyces cerevisiae: use of a synthetic chicken-lysozyme signal sequence for secretion  
132 and processing. Gene **43**:273-279.
